# Supplementary material for: Multi-physics ensemble modelling of Arctic tundra snowpack properties
Source: Copernicus journal article supplement (doi:10.5194/egusphere-2024-1237), 2024-05-13
Supplement: Supplementary file 1 [file egusphere-2024-1237-supplement.pdf]

## Supplementary Material (S1)

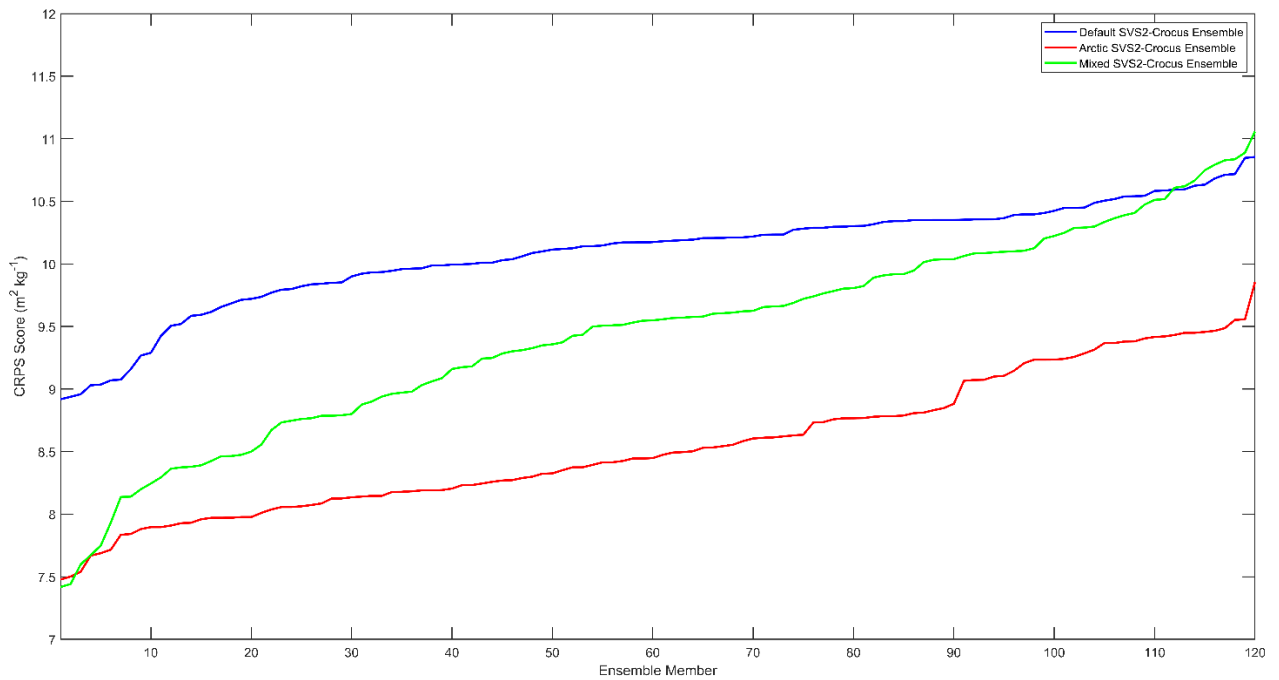

**S1:** Comparison of CRPS scores for all 120 members of the default, Arctic and mixed ensembles of SVS2-Crocus for the simulation of SSA ( $\text{m}^2 \text{kg}^{-1}$ ) averaged over the whole snowpack in March 2018, March 2019, March 2022 and March 2023.

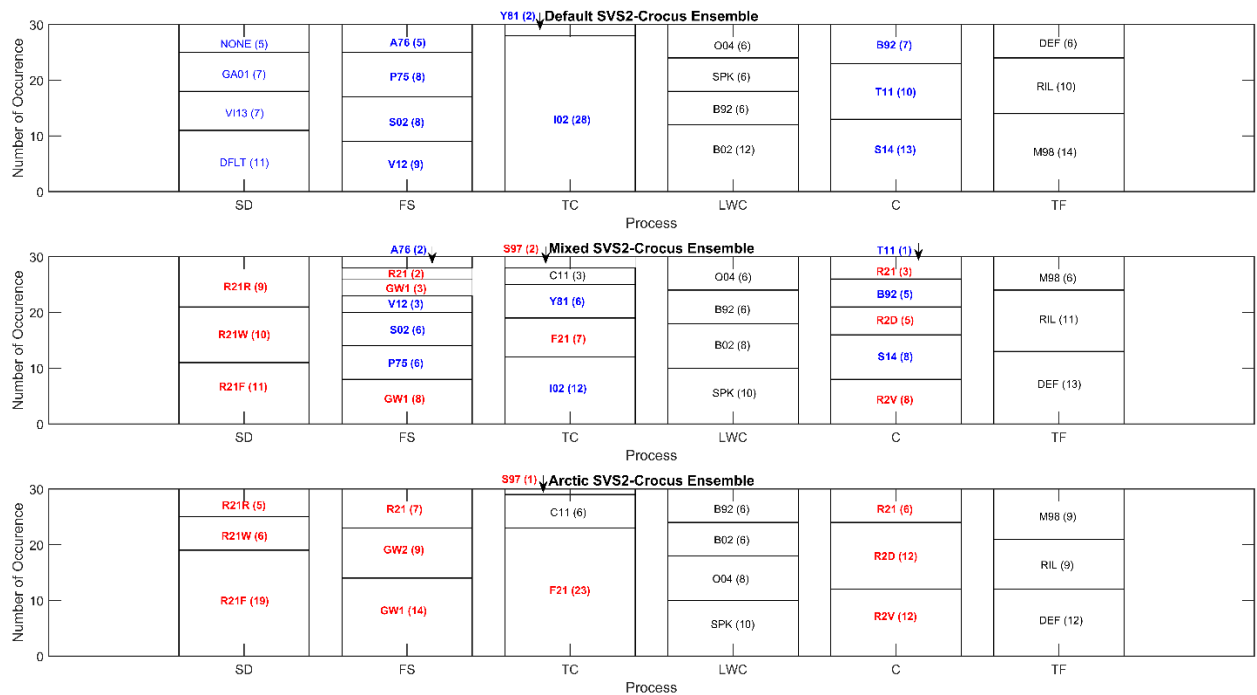

**S2:** Number of occurrences of each parameterisation in the top 30 members with the lowest CRPS scores for simulation of SSA by default, mixed and Arctic SVS2-Crocus. Blue indicates members of the default ensemble; red indicates members of the Arctic ensemble and black indicates members of both. Numbers in brackets represent number of occurrence. SD: Snowdrift, FS: Falling Snow, TC: Thermal Conductivity, LWC: Liquid Water Content, C: Compaction, TF: Turbulent Flux.
